# Supplementary material for: A ternary deep eutectic solvent-modified magnetic mixed iron hydroxide@MIL-101(Cr)-NH2 composite as a sorbent in magnetic solid phase extraction of organochlorine pesticides prior to GC-MS
Source: Royal Society of Chemistry journal article supplement (doi:10.1039/d2ra07704c), 2023-01-01
Supplement: d2ra07704c1.pdf [file d2ra07704c1.pdf]

## Supplementary Information

### **Ternary deep eutectic solvent-modified magnetic mixed iron hydroxide@MIL-101(Cr)-NH<sub>2</sub> composite as a sorbent in magnetic solid phase extraction of organochlorine pesticides prior to GC–MS**

Preeyaporn Phosiri,<sup>a</sup> Prachathipat Pongpinyo,<sup>b</sup> Yanawath Santaladchaiyakit,<sup>c</sup>

Rodjana Burakham<sup>a\*</sup>

<sup>a</sup>Materials Chemistry Research Center, Department of Chemistry, Faculty of Science, Khon Kaen University, Khon Kaen 40002, Thailand

<sup>b</sup>Agricultural Production Sciences Research and Development Office, Department of Agriculture, Bangkok 10900, Thailand

<sup>c</sup>Department of Chemistry, Faculty of Engineering, Rajamangala University of Technology Isan, Khon Kaen Campus, Khon Kaen 40000, Thailand

\*Corresponding author: Rodjana Burakham, Materials Chemistry Research Center, Department of Chemistry, Faculty of Science, Khon Kaen University, Khon Kaen 40002, Thailand; Fax: +66 4320 2373; Tel: +66 4300 9700 ext. 42174; e-mail: rodjbu@kku.ac.th

**Table S1** Abbreviations of TDESs and their molar ratios.

|             | Abbreviation    | log [P] | TDES1 | TDES2 | TDES3 | TDES4 | TDES5 | TDES6 |
|-------------|-----------------|---------|-------|-------|-------|-------|-------|-------|
| Molar ratio | Menthol         | 2.66    | 1     | 1     | 3     | 5     | 5     | 3     |
|             | Thymol          | 3.30    | 1     | 3     | 5     | 3     | 5     | 5     |
|             | Dodecanoic acid | 4.48    | 1     | 1     | 1     | 1     | 3     | 5     |

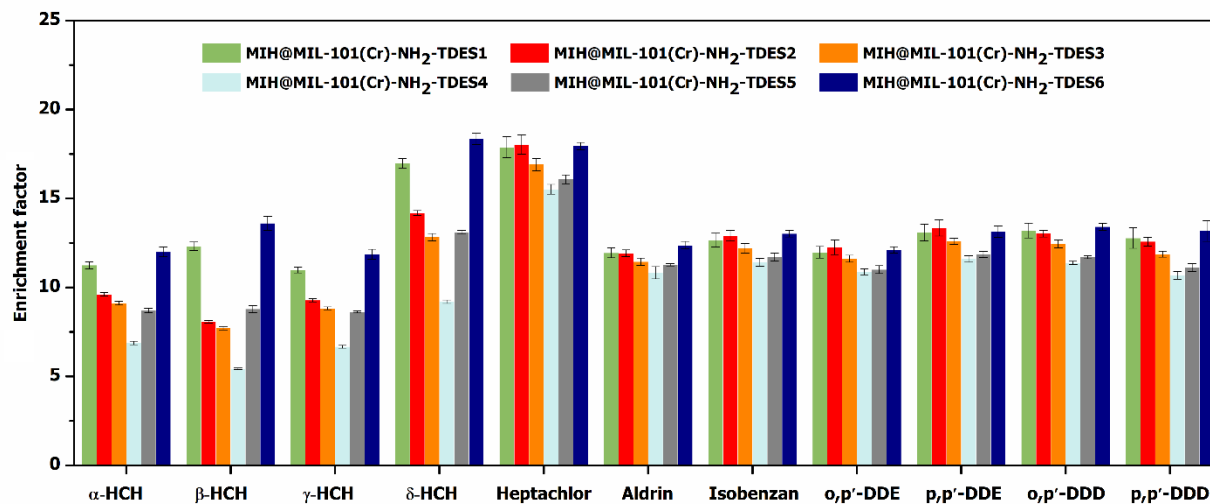

**Fig. S1** Extraction efficiency of the magnetic-metal organic framework modified with different ternary deep eutectic solvents. The magnetic solid phase extraction conditions were as follows: sorbent, 30 mg; extraction/desorption time, 30 s; desorption solvent, 0.5 mL of ethyl acetate; sample volume, 10 mL containing  $50 \mu\text{g L}^{-1}$  of each organochlorine pesticide.

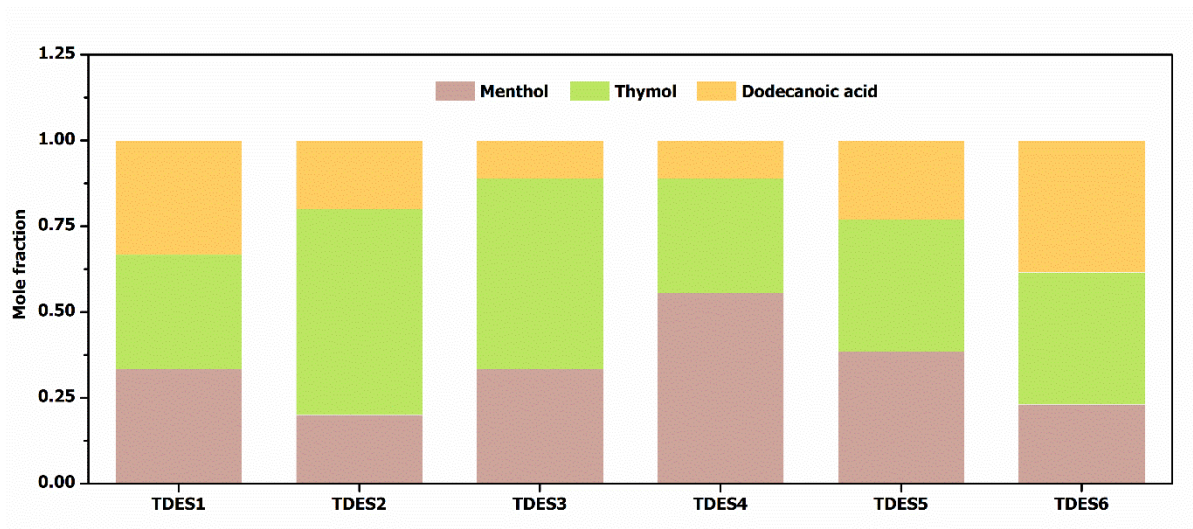

**Fig. S2** Mole fraction of menthol, thymol and dodecanoic acid in the ternary deep eutectic solvents.

**Table S2** Experimental factors, levels, and matrix of the Box–Behnken design for studying the synthesis conditions of MIH@MIL-101(Cr)-NH<sub>2</sub>-TDES and the central composite design for optimizing the conditions of magnetic solid phase extraction.

| Factor                             | Levels |      |      |     |      |
|------------------------------------|--------|------|------|-----|------|
| Box–Behnken design                 | -1     | 0    | +1   |     |      |
| $x_1$ : MOF amount (mg)            | 100    | 550  | 1000 |     |      |
| $x_2$ : TDES volume (mL)           | 0.10   | 0.55 | 1.00 |     |      |
| $x_3$ : Time (min)                 | 30     | 60   | 90   |     |      |
| Central composite design           | -2     | -1   | 0    | +1  | +2   |
| $X_1$ : Sorbent amount (mg)        | 10     | 25   | 40   | 55  | 70   |
| $X_2$ : NaCl concentration (% w/v) | 0      | 2.5  | 5.0  | 7.5 | 10.0 |
| $X_3$ : Extraction time (s)        | 10     | 30   | 50   | 70  | 90   |
| $X_4$ : Sample volume (mL)         | 10     | 20   | 30   | 40  | 50   |

**Table S3** Experimental design of the Box–Behnken design, the central composite design, and their responses.

| Run | Box–Behnken design            |                                |                          |                          | Central composite design          |                                          |                                   |                                  |                          |
|-----|-------------------------------|--------------------------------|--------------------------|--------------------------|-----------------------------------|------------------------------------------|-----------------------------------|----------------------------------|--------------------------|
|     | $x_1$ :<br>MOF amount<br>(mg) | $x_2$ :<br>TDES volume<br>(mL) | $x_3$ :<br>Time<br>(min) | Response:<br>Avg. of EFs | $X_1$ :<br>Sorbent amount<br>(mg) | $X_2$ :<br>NaCl concentration<br>(% w/v) | $X_3$ :<br>Extraction time<br>(s) | $X_4$ :<br>Sample volume<br>(mL) | Response:<br>Avg. of EFs |
| 1   | 100                           | 1.00                           | 60                       | 20.53                    | 55                                | 2.5                                      | 30                                | 20                               | 23.01                    |
| 2   | 550                           | 0.55                           | 60                       | 25.70                    | 25                                | 2.5                                      | 70                                | 20                               | 21.80                    |
| 3   | 550                           | 0.10                           | 30                       | 5.18                     | 55                                | 2.5                                      | 70                                | 20                               | 27.49                    |
| 4   | 100                           | 0.55                           | 30                       | 17.68                    | 55                                | 7.5                                      | 30                                | 40                               | 37.06                    |
| 5   | 100                           | 0.55                           | 90                       | 19.25                    | 40                                | 5.0                                      | 50                                | 30                               | 46.82                    |
| 6   | 550                           | 1.00                           | 90                       | 28.50                    | 25                                | 7.5                                      | 30                                | 20                               | 29.55                    |
| 7   | 1000                          | 1.00                           | 60                       | 22.92                    | 25                                | 7.5                                      | 30                                | 40                               | 32.00                    |
| 8   | 1000                          | 0.55                           | 30                       | 20.61                    | 40                                | 5.0                                      | 10                                | 30                               | 46.80                    |
| 9   | 100                           | 0.10                           | 60                       | 2.42                     | 70                                | 5.0                                      | 50                                | 30                               | 37.04                    |
| 10  | 550                           | 0.55                           | 60                       | 25.02                    | 25                                | 7.5                                      | 70                                | 20                               | 32.81                    |
| 11  | 550                           | 1.00                           | 30                       | 24.16                    | 55                                | 7.5                                      | 70                                | 20                               | 37.41                    |
| 12  | 550                           | 0.55                           | 60                       | 25.78                    | 40                                | 10.0                                     | 50                                | 30                               | 31.55                    |
| 13  | 1000                          | 0.10                           | 60                       | 4.00                     | 40                                | 5.0                                      | 50                                | 30                               | 47.47                    |
| 14  | 1000                          | 0.55                           | 90                       | 20.98                    | 25                                | 7.5                                      | 70                                | 40                               | 40.93                    |
| 15  | 550                           | 0.10                           | 90                       | 10.19                    | 25                                | 2.5                                      | 30                                | 40                               | 42.81                    |
| 16  | -                             | -                              | -                        | -                        | 55                                | 7.5                                      | 70                                | 40                               | 54.30                    |
| 17  | -                             | -                              | -                        | -                        | 40                                | 5.0                                      | 50                                | 50                               | 47.55                    |
| 18  | -                             | -                              | -                        | -                        | 40                                | 5.0                                      | 50                                | 10                               | 19.84                    |
| 19  | -                             | -                              | -                        | -                        | 10                                | 5.0                                      | 50                                | 30                               | 32.24                    |
| 20  | -                             | -                              | -                        | -                        | 55                                | 2.5                                      | 70                                | 40                               | 49.22                    |
| 21  | -                             | -                              | -                        | -                        | 40                                | 5.0                                      | 90                                | 30                               | 49.59                    |
| 22  | -                             | -                              | -                        | -                        | 40                                | 5.0                                      | 50                                | 30                               | 47.08                    |
| 23  | -                             | -                              | -                        | -                        | 25                                | 2.5                                      | 70                                | 40                               | 38.83                    |
| 24  | -                             | -                              | -                        | -                        | 40                                | 5.0                                      | 50                                | 30                               | 46.15                    |
| 25  | -                             | -                              | -                        | -                        | 40                                | 5.0                                      | 50                                | 30                               | 46.66                    |
| 26  | -                             | -                              | -                        | -                        | 55                                | 7.5                                      | 30                                | 20                               | 28.00                    |
| 27  | -                             | -                              | -                        | -                        | 40                                | 0.0                                      | 50                                | 30                               | 26.42                    |
| 28  | -                             | -                              | -                        | -                        | 25                                | 2.5                                      | 30                                | 20                               | 30.07                    |
| 29  | -                             | -                              | -                        | -                        | 40                                | 5.0                                      | 50                                | 30                               | 49.07                    |
| 30  | -                             | -                              | -                        | -                        | 55                                | 2.5                                      | 30                                | 40                               | 46.13                    |

**Table S4** ANOVA for the quadratic model of Box–Behnken design and central composite design.

| Source                          | Sum of Squares | df | Mean Square | F value | p value  |                 |
|---------------------------------|----------------|----|-------------|---------|----------|-----------------|
| <b>Box–Behnken design</b>       |                |    |             |         |          |                 |
| Model                           | 1021.50        | 9  | 113.50      | 77.95   | < 0.0001 | significant     |
| $x_1$ : MOF amount              | 9.31           | 1  | 9.31        | 6.39    | 0.0526   |                 |
| $x_2$ : TDES volume             | 690.43         | 1  | 690.43      | 474.18  | < 0.0001 |                 |
| $x_3$ : Time                    | 15.93          | 1  | 15.93       | 10.94   | 0.0213   |                 |
| $x_1 x_2$                       | 0.1640         | 1  | 0.1640      | 0.1127  | 0.7508   |                 |
| $x_1 x_3$                       | 0.3600         | 1  | 0.3600      | 0.2472  | 0.6401   |                 |
| $x_2 x_3$                       | 0.1122         | 1  | 0.1122      | 0.0771  | 0.7924   |                 |
| $x_1^2$                         | 100.03         | 1  | 100.03      | 68.70   | 0.0004   |                 |
| $x_2^2$                         | 226.23         | 1  | 226.23      | 155.37  | < 0.0001 |                 |
| $x_3^2$                         | 1.63           | 1  | 1.63        | 1.12    | 0.3381   |                 |
| Residual                        | 7.28           | 5  | 1.46        |         |          |                 |
| Lack of Fit                     | 6.93           | 3  | 2.31        | 13.25   | 0.0710   | not significant |
| Pure Error                      | 0.3488         | 2  | 0.1744      |         |          |                 |
| Cor Total                       | 1028.78        | 14 |             |         |          |                 |
| <b>Central composite design</b> |                |    |             |         |          |                 |
| Model                           | 2703.82        | 14 | 193.13      | 76.90   | < 0.0001 | significant     |
| $X_1$ : Sorbent amount          | 78.55          | 1  | 78.55       | 31.28   | < 0.0001 |                 |
| $X_2$ : NaCl concentration      | 21.97          | 1  | 21.97       | 8.75    | 0.0098   |                 |
| $X_3$ : Extraction time         | 65.80          | 1  | 65.80       | 26.20   | 0.0001   |                 |
| $X_4$ : Sample volume           | 1155.93        | 1  | 1155.93     | 460.28  | < 0.0001 |                 |
| $X_1 X_2$                       | 5.22           | 1  | 5.22        | 2.08    | 0.1699   |                 |
| $X_1 X_3$                       | 73.44          | 1  | 73.44       | 29.25   | < 0.0001 |                 |
| $X_1 X_4$                       | 57.99          | 1  | 57.99       | 23.09   | 0.0002   |                 |
| $X_2 X_3$                       | 118.37         | 1  | 118.37      | 47.14   | < 0.0001 |                 |
| $X_2 X_4$                       | 90.73          | 1  | 90.73       | 36.13   | < 0.0001 |                 |
| $X_3 X_4$                       | 16.81          | 1  | 16.81       | 6.69    | 0.0206   |                 |
| $X_1^2$                         | 290.23         | 1  | 290.23      | 115.57  | < 0.0001 |                 |
| $X_2^2$                         | 597.33         | 1  | 597.33      | 237.85  | < 0.0001 |                 |
| $X_3^2$                         | 0.5061         | 1  | 0.5061      | 0.2015  | 0.6599   |                 |
| $X_4^2$                         | 333.92         | 1  | 333.92      | 132.97  | < 0.0001 |                 |
| Residual                        | 37.67          | 15 | 2.51        |         |          |                 |
| Lack of Fit                     | 32.55          | 10 | 3.25        | 3.18    | 0.1070   | not significant |
| Pure Error                      | 5.12           | 5  | 1.02        |         |          |                 |

Cor Total

2741.49

29

---



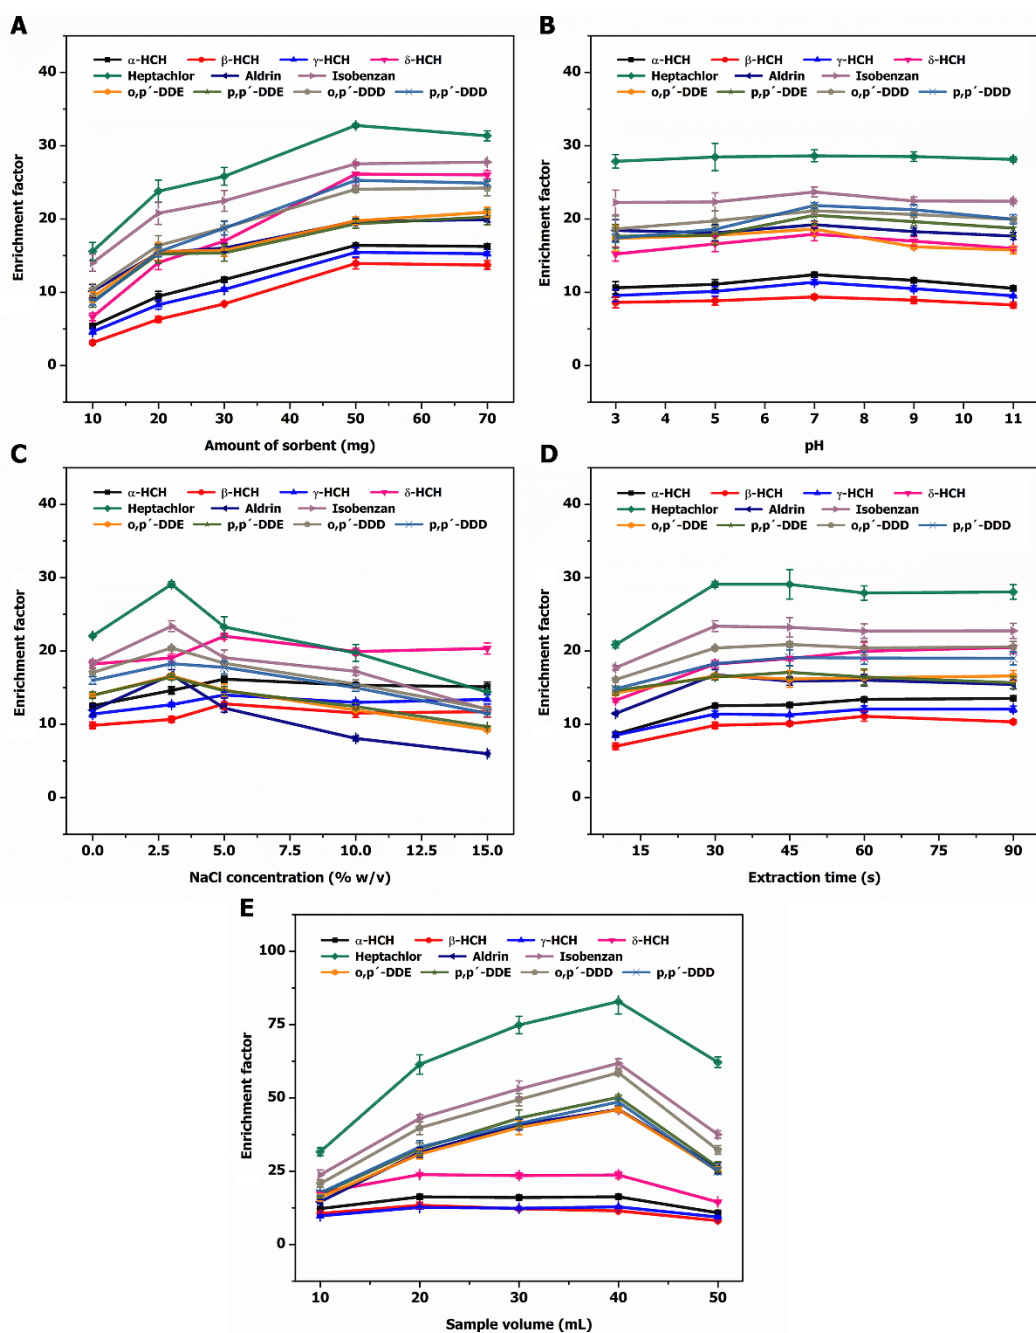

**Fig. S3** Effect of (A) sorbent amount, (B) pH of sample solution, (C) salt addition, (D) extraction time, and (E) sample volume. The magnetic solid phase extraction conditions were as follows: amount of sorbent, 30 mg; extraction/desorption time, 30 s; desorption solvent, 500  $\mu$ L; and sample volume, 20 mL, containing 5  $\mu$ g L<sup>-1</sup> of each OCP.

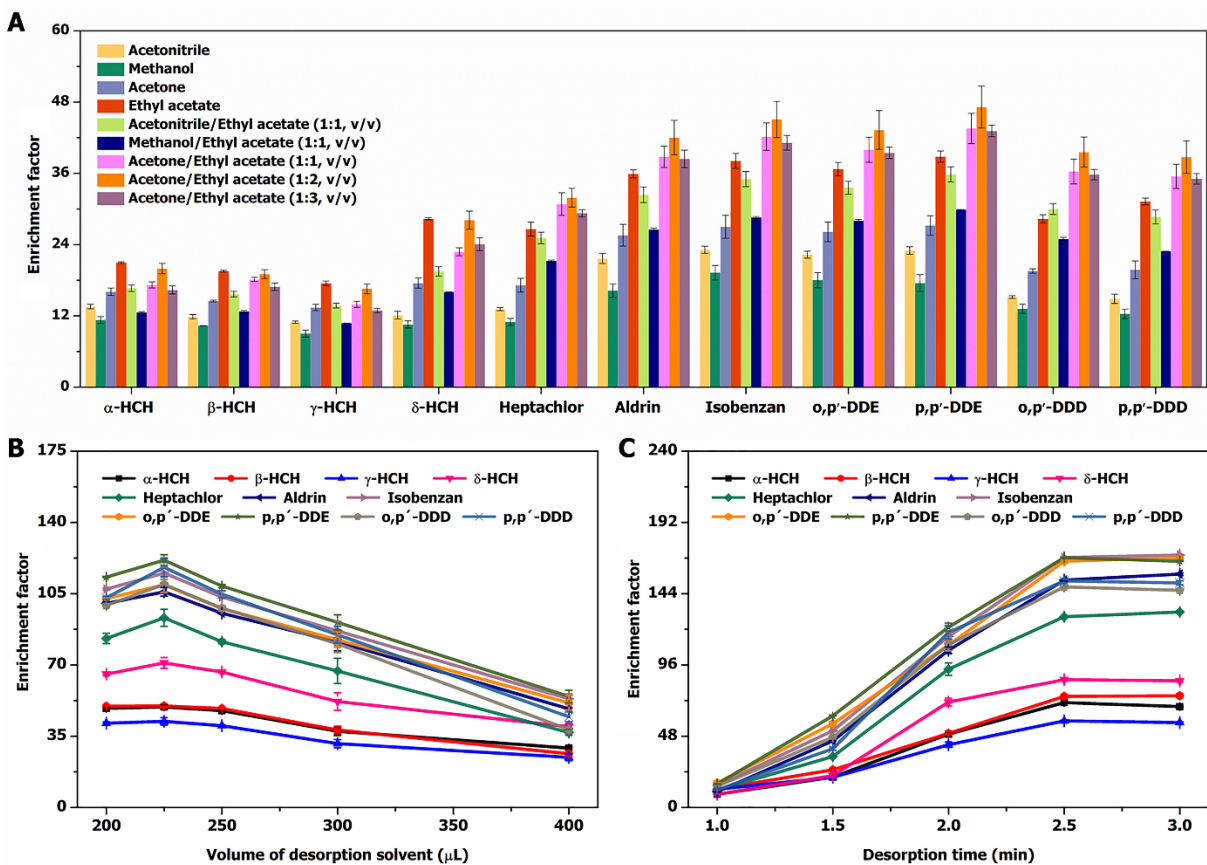

**Fig. S4** Effect of (A) desorption solvent, (B) desorption solvent volume, and (C) desorption time.

The magnetic solid phase extraction conditions were as follows: sorbent, 45 mg;

extraction time, 70 s; and sample volume, 40 mL containing 5% (w/v) sodium chloride.

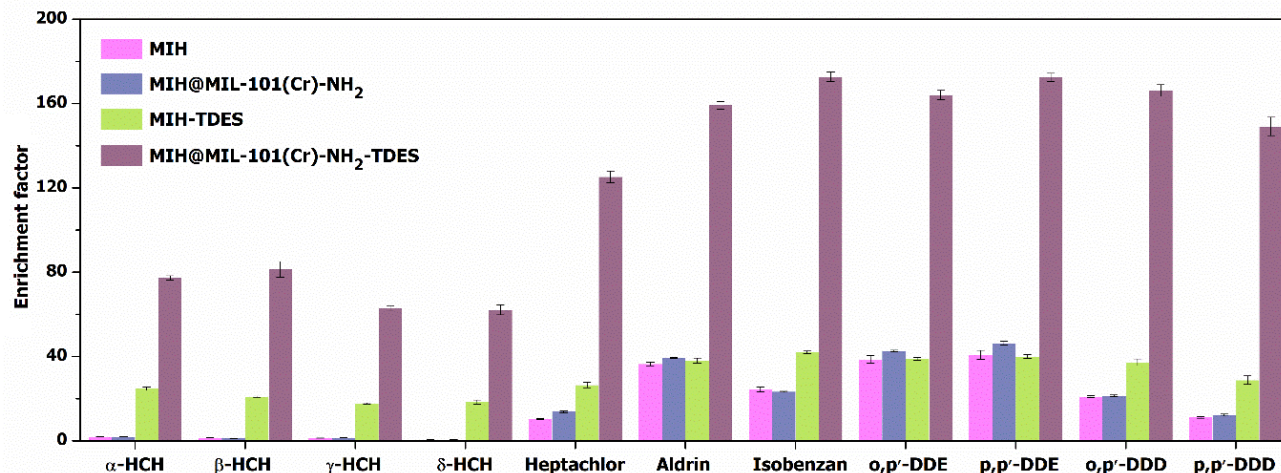

**Fig. S5** Extraction efficiencies of various sorbents. The magnetic solid phase extraction conditions were as follows: sorbent, 45 mg; extraction time, 70 s; desorption time, 2.5 min; desorption solvent, 225  $\mu\text{L}$  of acetone/ethyl acetate (1:2, v/v); and sample solution, 40 mL of OCP solution ( $5 \mu\text{g L}^{-1}$  of each) containing 5% (w/v) sodium chloride.

**Table S5** Analytical performance for the determination of OCPs in honey and tea samples.

| Matrix     | Analyte       | Linear range<br>(ng·g <sup>-1</sup> ) | R <sup>2</sup> | LODs<br>(ng·g <sup>-1</sup> ) | LOQs<br>(ng·g <sup>-1</sup> ) | RSDs <sup>a</sup>   |                       |
|------------|---------------|---------------------------------------|----------------|-------------------------------|-------------------------------|---------------------|-----------------------|
|            |               |                                       |                |                               |                               | Intraday<br>(n = 5) | Interday<br>(n = 5x3) |
| Honey      | α-HCH         | 0.80–1000                             | 0.9993         | 0.50                          | 0.80                          | 4.5                 | 5.2                   |
|            | β-HCH         | 1.0–1000                              | 0.9996         | 0.70                          | 1.00                          | 3.7                 | 3.1                   |
|            | γ-HCH         | 1.0–1000                              | 0.9998         | 0.70                          | 1.00                          | 1.9                 | 7.9                   |
|            | δ-HCH         | 1.0–1000                              | 0.9963         | 0.80                          | 1.00                          | 4.2                 | 5.2                   |
|            | Heptachlor    | 0.40–1000                             | 0.9979         | 0.25                          | 0.40                          | 6.3                 | 5.1                   |
|            | Aldrin        | 0.50–1000                             | 0.9967         | 0.30                          | 0.50                          | 6.9                 | 6.6                   |
|            | Isobenzan     | 0.50–1000                             | 0.9976         | 0.30                          | 0.50                          | 5.5                 | 6.0                   |
|            | o,p'-DDE      | 0.10–1000                             | 0.9946         | 0.07                          | 0.10                          | 7.6                 | 7.0                   |
|            | p,p'-DDE      | 0.10–1000                             | 0.9945         | 0.07                          | 0.10                          | 7.4                 | 7.4                   |
|            | o,p'-DDD      | 0.30–1000                             | 0.9951         | 0.15                          | 0.30                          | 5.4                 | 4.1                   |
|            | p,p'-DDD      | 0.50–1000                             | 0.9970         | 0.25                          | 0.50                          | 4.1                 | 6.3                   |
|            | Tea<br>leaves | α-HCH                                 | 4.0–2500       | 0.9956                        | 3.0                           | 4.0                 | 3.1                   |
| β-HCH      |               | 1.5–2500                              | 0.9980         | 1.0                           | 1.5                           | 3.5                 | 4.9                   |
| γ-HCH      |               | 5.0–2500                              | 0.9977         | 3.0                           | 5.0                           | 3.6                 | 5.3                   |
| δ-HCH      |               | 10.0–2500                             | 0.9977         | 8.5                           | 10.0                          | 4.3                 | 5.1                   |
| Heptachlor |               | 4.0–2500                              | 0.9997         | 2.5                           | 4.0                           | 2.8                 | 4.9                   |
| Aldrin     |               | 4.0–2500                              | 0.9982         | 2.5                           | 4.0                           | 1.5                 | 6.9                   |
| Isobenzan  |               | 4.0–2500                              | 0.9980         | 2.5                           | 4.0                           | 1.8                 | 7.4                   |
| o,p'-DDE   |               | 1.0–2500                              | 0.9982         | 0.7                           | 1.0                           | 3.8                 | 5.9                   |
| p,p'-DDE   |               | 1.0–2500                              | 0.9974         | 0.7                           | 1.0                           | 3.7                 | 4.9                   |
| o,p'-DDD   |               | 2.0–2500                              | 0.9995         | 1.5                           | 2.0                           | 6.2                 | 8.2                   |
| p,p'-DDD   |               | 10.0–2500                             | 0.9983         | 8.5                           | 10.0                          | 7.7                 | 7.4                   |

<sup>a</sup>Spiked at 20 ng·g<sup>-1</sup> and 100 ng·g<sup>-1</sup> of each OCP in honey and tea samples, respectively.

**Table S6** Matrix effects of each real sample.

| Analyte       | ME (%) <sup>a</sup> |        |        |            |               |              |
|---------------|---------------------|--------|--------|------------|---------------|--------------|
|               | Honey1              | Honey2 | Honey3 | Wulong tea | Biluochun tea | Longjing tea |
| $\alpha$ -HCH | -7.8                | -11.2  | -24.6  | -30.1      | -31.5         | -20.9        |
| $\beta$ -HCH  | -19.6               | -20.9  | -15.6  | -9.3       | -3.7          | -10.7        |
| $\gamma$ -HCH | -29.8               | -21.9  | -6.5   | -0.4       | -12.1         | -5.6         |
| $\delta$ -HCH | -67.8               | -82.5  | -45.3  | -40.3      | -39.9         | -30.6        |
| Heptachlor    | -50.7               | -60.1  | -71.0  | -50.8      | -32.5         | -38.3        |
| Aldrin        | -49.4               | -48.1  | -15.1  | -10.9      | -5.9          | -7.7         |
| Isobenzan     | -50.2               | -37.3  | -19.0  | -19.4      | -21.5         | -18.3        |
| o,p'-DDE      | -53.5               | -47.9  | -29.2  | -22.5      | -9.4          | -20.1        |
| p,p'-DDE      | -52.0               | -47.9  | -27.8  | -17.6      | -6.8          | -15.9        |
| o,p'-DDD      | -36.6               | -40.7  | -19.1  | -1.6       | -9.4          | -10.0        |
| p,p'-DDD      | -16.4               | -21.7  | -41.3  | -27.2      | -11.7         | -22.3        |

<sup>a</sup> Matrix effect

**Table S7** Recoveries of the spiked honey samples.

| Analyte    | Added<br>(ng·g <sup>-1</sup> ) | Honey1                         |                                          | Honey2                         |                | Honey3                         |                |
|------------|--------------------------------|--------------------------------|------------------------------------------|--------------------------------|----------------|--------------------------------|----------------|
|            |                                | Found<br>(ng·g <sup>-1</sup> ) | R <sup>a</sup> ± RSD <sup>b</sup><br>(%) | Found<br>(ng·g <sup>-1</sup> ) | R ± RSD<br>(%) | Found<br>(ng·g <sup>-1</sup> ) | R ± RSD<br>(%) |
| α-HCH      | -                              | N.D. <sup>c</sup>              | -                                        | N.D.                           | -              | N.D.                           | -              |
|            | 1.00                           | 0.91                           | 90.9 ± 5.3                               | 0.95                           | 94.7 ± 6.7     | 1.05                           | 104.8 ± 1.0    |
|            | 2.00                           | 2.01                           | 100.3 ± 1.6                              | 2.09                           | 104.4 ± 1.2    | 1.86                           | 92.9 ± 6.8     |
|            | 4.00                           | 3.96                           | 98.9 ± 5.9                               | 3.97                           | 99.1 ± 2.9     | 3.97                           | 99.2 ± 3.4     |
| β-HCH      | -                              | N.D.                           | -                                        | N.D.                           | -              | N.D.                           | -              |
|            | 1.00                           | 0.87                           | 86.7 ± 5.8                               | 0.94                           | 94.3 ± 7.8     | 1.01                           | 100.7 ± 0.7    |
|            | 2.00                           | 2.07                           | 103.3 ± 1.0                              | 1.96                           | 98.0 ± 0.6     | 2.12                           | 106.1 ± 1.8    |
|            | 4.00                           | 4.14                           | 103.5 ± 2.0                              | 3.93                           | 98.1 ± 1.0     | 3.62                           | 90.5 ± 1.5     |
| γ-HCH      | -                              | N.D.                           | -                                        | N.D.                           | -              | N.D.                           | -              |
|            | 1.00                           | 0.86                           | 85.8 ± 5.4                               | 0.93                           | 92.9 ± 4.8     | 1.09                           | 109.2 ± 2.3    |
|            | 2.00                           | 2.02                           | 101.2 ± 7.0                              | 1.83                           | 91.7 ± 0.9     | 1.83                           | 91.5 ± 4.4     |
|            | 4.00                           | 3.96                           | 99.1 ± 7.7                               | 3.91                           | 97.7 ± 2.8     | 3.88                           | 96.9 ± 3.1     |
| δ-HCH      | -                              | N.D.                           | -                                        | N.D.                           | -              | N.D.                           | -              |
|            | 1.00                           | 1.07                           | 107.3 ± 2.2                              | 0.92                           | 91.8 ± 1.8     | 0.91                           | 90.7 ± 2.1     |
|            | 2.00                           | 1.82                           | 91.2 ± 8.8                               | 1.80                           | 89.8 ± 3.3     | 1.72                           | 86.0 ± 2.2     |
|            | 4.00                           | 3.97                           | 99.2 ± 7.1                               | 3.93                           | 98.4 ± 3.0     | 3.89                           | 97.4 ± 5.5     |
| Heptachlor | -                              | N.D.                           | -                                        | N.D.                           | -              | N.D.                           | -              |
|            | 1.00                           | 0.91                           | 91.2 ± 4.1                               | 0.91                           | 90.7 ± 4.6     | 1.02                           | 102.4 ± 0.1    |
|            | 2.00                           | 2.03                           | 101.5 ± 9.6                              | 2.06                           | 102.8 ± 0.9    | 1.88                           | 94.2 ± 2.8     |
|            | 4.00                           | 3.80                           | 95.0 ± 7.7                               | 4.07                           | 101.7 ± 2.7    | 3.52                           | 88.1 ± 4.3     |
| Aldrin     | -                              | N.D.                           | -                                        | N.D.                           | -              | N.D.                           | -              |
|            | 1.00                           | 0.89                           | 88.8 ± 2.0                               | 0.89                           | 89.2 ± 1.4     | 0.99                           | 98.8 ± 0.2     |
|            | 2.00                           | 2.15                           | 107.3 ± 2.7                              | 1.98                           | 98.9 ± 0.4     | 1.96                           | 98.0 ± 5.4     |
|            | 4.00                           | 3.75                           | 93.6 ± 6.4                               | 4.15                           | 103.9 ± 0.8    | 3.58                           | 89.6 ± 2.7     |
| Isobenzan  | -                              | N.D.                           | -                                        | N.D.                           | -              | N.D.                           | -              |
|            | 1.00                           | 0.85                           | 85.2 ± 2.9                               | 0.85                           | 85.4 ± 7.0     | 0.96                           | 96.0 ± 0.7     |
|            | 2.00                           | 2.10                           | 105.0 ± 0.8                              | 1.95                           | 97.4 ± 1.0     | 2.01                           | 100.7 ± 1.0    |
|            | 4.00                           | 3.78                           | 94.5 ± 5.7                               | 3.45                           | 86.2 ± 1.2     | 3.54                           | 88.5 ± 2.2     |
| o,p'-DDE   | -                              | N.D.                           | -                                        | N.D.                           | -              | N.D.                           | -              |
|            | 1.00                           | 0.95                           | 95.3 ± 3.2                               | 1.00                           | 100.3 ± 6.6    | 0.93                           | 92.9 ± 1.9     |
|            | 2.00                           | 2.11                           | 105.6 ± 3.3                              | 1.83                           | 91.6 ± 0.8     | 2.02                           | 101.1 ± 0.2    |
|            | 4.00                           | 3.77                           | 94.4 ± 5.1                               | 4.03                           | 100.6 ± 0.7    | 3.62                           | 90.5 ± 1.8     |
| p,p'-DDE   | -                              | N.D.                           | -                                        | N.D.                           | -              | N.D.                           | -              |
|            | 1.00                           | 0.97                           | 97.1 ± 3.5                               | 0.85                           | 84.8 ± 1.1     | 0.87                           | 87.5 ± 1.1     |
|            | 2.00                           | 2.11                           | 105.7 ± 7.8                              | 1.80                           | 90.0 ± 0.7     | 1.99                           | 99.5 ± 0.7     |
|            | 4.00                           | 3.78                           | 94.4 ± 5.9                               | 4.20                           | 105.0 ± 0.9    | 3.72                           | 93.0 ± 2.5     |
| o,p'-DDD   | -                              | N.D.                           | -                                        | N.D.                           | -              | N.D.                           | -              |
|            | 1.00                           | 0.82                           | 81.7 ± 0.7                               | 0.93                           | 93.4 ± 3.9     | 1.04                           | 103.7 ± 2.5    |
|            | 2.00                           | 1.97                           | 98.6 ± 3.2                               | 1.85                           | 92.5 ± 0.7     | 2.15                           | 107.5 ± 6.4    |
|            | 4.00                           | 3.67                           | 91.7 ± 6.2                               | 5.30                           | 88.4 ± 0.8     | 3.36                           | 84.0 ± 3.1     |
| p,p'-DDD   | -                              | N.D.                           | -                                        | N.D.                           | -              | N.D.                           | -              |
|            | 1.00                           | 0.86                           | 85.7 ± 0.3                               | 0.98                           | 97.8 ± 1.1     | 1.00                           | 100.4 ± 0.4    |
|            | 2.00                           | 1.75                           | 87.4 ± 1.6                               | 1.98                           | 98.8 ± 0.5     | 1.93                           | 96.3 ± 3.5     |
|            | 4.00                           | 4.04                           | 101.0 ± 4.3                              | 3.59                           | 89.8 ± 1.0     | 3.41                           | 85.3 ± 5.1     |

<sup>a</sup> Recovery, <sup>b</sup> Relative standard deviation, <sup>c</sup> Not detected

**Table S8** Recoveries of the spiked tea samples.

| Analyte    | Added<br>(ng·g <sup>-1</sup> ) | Wulong tea                     |                                          | Biluochun tea                  |                | Longjing tea                   |                |
|------------|--------------------------------|--------------------------------|------------------------------------------|--------------------------------|----------------|--------------------------------|----------------|
|            |                                | Found<br>(ng·g <sup>-1</sup> ) | R <sup>a</sup> ± RSD <sup>b</sup><br>(%) | Found<br>(ng·g <sup>-1</sup> ) | R ± RSD<br>(%) | Found<br>(ng·g <sup>-1</sup> ) | R ± RSD<br>(%) |
| α-HCH      | -                              | N.D. <sup>c</sup>              | -                                        | N.D.                           | -              | N.D.                           | -              |
|            | 10.0                           | 9.5                            | 95.5 ± 2.3                               | 10.4                           | 104.0 ± 0.4    | 10.2                           | 102.4 ± 0.5    |
|            | 15.0                           | 15.5                           | 103.6 ± 6.7                              | 14.6                           | 97.6 ± 0.3     | 15.1                           | 100.5 ± 3.1    |
|            | 20.0                           | 21.9                           | 109.3 ± 1.4                              | 20.3                           | 101.6 ± 2.4    | 20.5                           | 102.4 ± 2.0    |
| β-HCH      | -                              | N.D.                           | -                                        | N.D.                           | -              | N.D.                           | -              |
|            | 10.0                           | 9.2                            | 92.2 ± 6.0                               | 10.1                           | 100.7 ± 5.0    | 9.7                            | 96.8 ± 5.5     |
|            | 15.0                           | 14.8                           | 98.7 ± 4.8                               | 14.9                           | 99.6 ± 2.2     | 14.7                           | 97.8 ± 2.5     |
|            | 20.0                           | 21.3                           | 106.6 ± 4.4                              | 19.5                           | 97.7 ± 1.1     | 19.7                           | 98.3 ± 1.0     |
| γ-HCH      | -                              | N.D.                           | -                                        | N.D.                           | -              | N.D.                           | -              |
|            | 10.0                           | 9.7                            | 97.3 ± 5.5                               | 8.5                            | 85.4 ± 2.9     | 8.7                            | 87.5 ± 1.7     |
|            | 15.0                           | 16.3                           | 108.7 ± 4.3                              | 14.4                           | 96.1 ± 1.8     | 14.8                           | 98.6 ± 1.0     |
|            | 20.0                           | 20.8                           | 103.8 ± 3.8                              | 20.4                           | 102.2 ± 0.7    | 21.2                           | 106.2 ± 3.3    |
| δ-HCH      | -                              | N.D.                           | -                                        | N.D.                           | -              | N.D.                           | -              |
|            | 10.0                           | 9.9                            | 99.1 ± 3.9                               | 10.3                           | 102.7 ± 5.6    | 9.7                            | 96.6 ± 4.9     |
|            | 15.0                           | 13.1                           | 87.5 ± 3.4                               | 14.6                           | 97.1 ± 0.4     | 15.5                           | 103.5 ± 5.1    |
|            | 20.0                           | 21.3                           | 106.5 ± 0.8                              | 20.0                           | 99.9 ± 2.1     | 19.8                           | 99.1 ± 2.1     |
| Heptachlor | -                              | N.D.                           | -                                        | N.D.                           | -              | N.D.                           | -              |
|            | 10.0                           | 9.5                            | 94.6 ± 5.0                               | 9.5                            | 95.4 ± 0.7     | 9.7                            | 97.0 ± 2.8     |
|            | 15.0                           | 13.2                           | 88.1 ± 1.6                               | 14.7                           | 98.1 ± 1.1     | 14.7                           | 98.1 ± 2.0     |
|            | 20.0                           | 20.3                           | 101.5 ± 0.5                              | 20.0                           | 100.1 ± 2.7    | 20.3                           | 101.4 ± 3.6    |
| Aldrin     | -                              | N.D.                           | -                                        | N.D.                           | -              | N.D.                           | -              |
|            | 10.0                           | 9.5                            | 94.7 ± 2.9                               | 9.8                            | 98.2 ± 1.3     | 10.0                           | 99.6 ± 1.8     |
|            | 15.0                           | 15.3                           | 101.7 ± 3.8                              | 14.7                           | 98.0 ± 0.2     | 14.7                           | 98.2 ± 1.9     |
|            | 20.0                           | 21.2                           | 105.8 ± 0.9                              | 20.0                           | 100.0 ± 0.5    | 19.8                           | 98.8 ± 5.6     |
| Isobenzan  | -                              | N.D.                           | -                                        | N.D.                           | -              | N.D.                           | -              |
|            | 10.0                           | 9.6                            | 95.5 ± 5.5                               | 9.7                            | 97.1 ± 1.6     | 9.6                            | 96.1 ± 1.3     |
|            | 15.0                           | 15.2                           | 101.1 ± 6.6                              | 15.0                           | 99.9 ± 0.7     | 15.1                           | 100.5 ± 2.4    |
|            | 20.0                           | 21.2                           | 106.2 ± 1.3                              | 20.0                           | 100.0 ± 1.1    | 19.7                           | 98.5 ± 4.4     |
| o,p'-DDE   | -                              | N.D.                           | -                                        | N.D.                           | -              | N.D.                           | -              |
|            | 10.0                           | 10.5                           | 105.3 ± 8.1                              | 9.9                            | 99.1 ± 0.7     | 9.9                            | 99.1 ± 3.4     |
|            | 15.0                           | 15.3                           | 101.8 ± 7.0                              | 14.6                           | 97.6 ± 0.3     | 14.5                           | 96.6 ± 4.0     |
|            | 20.0                           | 21.1                           | 105.7 ± 1.2                              | 20.0                           | 99.9 ± 0.6     | 20.6                           | 103.1 ± 2.8    |
| p,p'-DDE   | -                              | N.D.                           | -                                        | N.D.                           | -              | N.D.                           | -              |
|            | 10.0                           | 9.7                            | 97.2 ± 4.1                               | 10.0                           | 99.5 ± 0.1     | 9.8                            | 97.6 ± 1.7     |
|            | 15.0                           | 14.8                           | 98.5 ± 4.0                               | 14.5                           | 96.4 ± 0.4     | 15.0                           | 100.2 ± 3.3    |
|            | 20.0                           | 21.5                           | 107.3 ± 2.1                              | 20.0                           | 99.9 ± 0.2     | 20.6                           | 102.9 ± 3.7    |
| o,p'-DDD   | -                              | N.D.                           | -                                        | N.D.                           | -              | N.D.                           | -              |
|            | 10.0                           | 9.2                            | 92.5 ± 0.7                               | 10.2                           | 101.9 ± 1.3    | 10.1                           | 101.1 ± 4.1    |
|            | 15.0                           | 15.8                           | 105.1 ± 2.4                              | 13.5                           | 89.7 ± 1.7     | 13.8                           | 92.3 ± 3.2     |
|            | 20.0                           | 20.1                           | 100.6 ± 1.5                              | 20.0                           | 99.9 ± 0.5     | 20.3                           | 101.5 ± 4.3    |
| p,p'-DDD   | -                              | N.D.                           | -                                        | N.D.                           | -              | N.D.                           | -              |
|            | 10.0                           | 9.0                            | 90.2 ± 7.6                               | 9.8                            | 98.1 ± 4.4     | 9.9                            | 99.1 ± 4.7     |
|            | 15.0                           | 13.9                           | 92.4 ± 1.7                               | 14.5                           | 96.9 ± 0.2     | 14.7                           | 98.0 ± 1.7     |
|            | 20.0                           | 21.2                           | 106.2 ± 0.9                              | 20.1                           | 100.6 ± 1.9    | 19.3                           | 96.6 ± 4.7     |

<sup>a</sup> Recovery, <sup>b</sup> Relative standard deviation, <sup>c</sup> Not detected

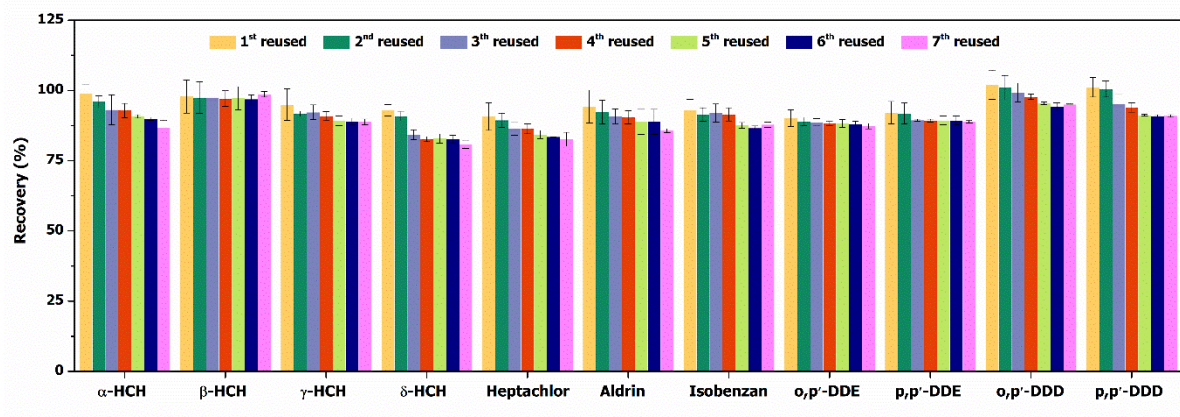

**Fig. S6** Reusability of the sorbent MIH@MIL-101(Cr)-NH<sub>2</sub>-TDES for the enrichment of organochlorine pesticides. The magnetic solid phase extraction conditions were as follows: sorbent, 45 mg; extraction time, 70 s; desorption time, 2.5 min; desorption solvent, 225  $\mu$ L of acetone/ethyl acetate (1:2, v/v); and sample solution, 40 mL of OCP solution (1  $\mu$ g L<sup>-1</sup> of each) containing 5% (w/v) sodium chloride.



**Table S9** Comparison of the proposed MSPE/GC–MS with other methods for the determination of OCPs.

| Extractants <sup>Ref.</sup>                                                | Method          | Number of analytes | Matrix                        | Extraction time | Linear range                | LODs                           | Recoveries (%) | RSDs (%) |
|----------------------------------------------------------------------------|-----------------|--------------------|-------------------------------|-----------------|-----------------------------|--------------------------------|----------------|----------|
| CD-MOF/TiO <sub>2</sub> <sup>3</sup>                                       | D-SPE/GC–MS/MS  | 14                 | Honeys                        | 5 min           | 1–500 ng·g <sup>-1</sup>    | 0.01–0.04 ng g <sup>-1</sup>   | 76.4–114.3     | < 11.3   |
| MFCNTs <sup>4</sup>                                                        | MSPE/GC-ECD     | 8                  | Honeys                        | 40 min          | 0.02–80 µg·L <sup>-1</sup>  | 1.3–3.6 ng L <sup>-1</sup>     | 83.2–128.7     | < 6.4    |
|                                                                            |                 |                    | Tea leaves                    |                 |                             |                                | 72.6–111.0     | < 6.8    |
| Porous polypropylene membrane <sup>7</sup>                                 | UAE/GC–MS       | 13                 | Tea leaves                    | 60 min          | 5–500 ng·g <sup>-1</sup>    | 1.4–7.2 ng g <sup>-1</sup>     | 86.1–100.3     | < 16     |
| Fe <sub>3</sub> O <sub>4</sub> @MIL-100 (Fe) <sup>8</sup>                  | MCMSPE/GC–MS    | 5                  | Tea leaves                    | 40 s            | 13–2130 ng·g <sup>-1</sup>  | 0.62–3.92 ng g <sup>-1</sup>   | 81.5–113.6     | < 9.9    |
| Fe <sub>3</sub> O <sub>4</sub> -NH <sub>2</sub> @MIL-101(Cr) <sup>18</sup> | MAE-MSPE/GC-ECD | 8                  | Soils                         | 5 min           | 0.50–80 ng·g <sup>-1</sup>  | 0.15–0.28 ng·g <sup>-1</sup>   | 71.2–102.4     | < 4.9    |
| M-M-ZIF-67 <sup>28</sup>                                                   | MSPE/GC–MS/MS   | 9                  | Agricultural irrigation water | 20 min          | 1–200 µg·L <sup>-1</sup>    | 0.07–1.03 µg·L <sup>-1</sup>   | 74.9–116.3     | < 8.5    |
| Fe <sub>3</sub> O <sub>4</sub> @PDA@Zr-SO <sub>3</sub> H <sup>29</sup>     | MSPE/GC-ECD     | 8                  | Environmental water           | 8 min           | 0.05–300 µg·L <sup>-1</sup> | 0.005–0.016 µg·L <sup>-1</sup> | 82–118         | < 7.7    |
| MIH@MIL-101(Cr)-NH <sub>2</sub> -TDES <sup>This study</sup>                | MSPE/GC–MS      | 11                 | Honey                         | 70 s            | 0.1–1000 ng·g <sup>-1</sup> | 0.07–0.80 ng·g <sup>-1</sup>   | 81.7–107.3     | < 7.9    |
|                                                                            |                 |                    | Tea leaves                    |                 | 1.0–2500 ng·g <sup>-1</sup> | 0.7–8.5 ng·g <sup>-1</sup>     | 85.4–109.3     | < 8.2    |

CD-MOF/TiO<sub>2</sub>: β- Cyclodextrin/metal organic framework grafted onto titanium dioxide

MFCNTs: Magnetic cobalt ferrite-filled carbon nanotubes

M-M-ZIF-67: Zeolitic imidazolate framework based on magnetic multiwalled carbon nanotubes

Fe<sub>3</sub>O<sub>4</sub>@PDA@Zr-SO<sub>3</sub>H: metal organic framework functionalized with sulfonic acid combined with magnetic nanoparticles

D-SPE: dispersive solid phase extraction

MSPE: Magnetic solid phase extraction

UAE: Ultrasound-assisted extraction

MCMSPE: Mechanochemical magnetic solid phase extraction

MAE-MSPE: Microwave-assisted magnetic solid phase extraction
